# Supplementary material for: Brain-Derived Neurotrophic Factor Signaling and Subgenual Anterior Cingulate Cortex Dysfunction in Major Depressive Disorder
Source: Atypon-hosted journal article supplement (doi:10.1176/appi.ajp.2012.12020248), 2012-11-01
Supplement: 1194_ds001.pdf [file 1194_ds001.pdf]

**Supplemental Table 1. Demographics of Post-Mortem Subjects**

|               | Control Group |                   |      |      |     |           |       | Major Depression Group |                   |      |      |     |           |     |         |                   |                   |                  |
|---------------|---------------|-------------------|------|------|-----|-----------|-------|------------------------|-------------------|------|------|-----|-----------|-----|---------|-------------------|-------------------|------------------|
|               | Case          | Race <sup>2</sup> | Age  | PMI  | pH  | RNA ratio | RIN   | Case                   | Race <sup>2</sup> | Age  | PMI  | pH  | RNA ratio | RIN | Suicide | Recurrent Episode | PTOD <sup>1</sup> | MOD <sup>3</sup> |
| <b>Male</b>   | 795           | W                 | 68   | 12.0 | 6.6 | 1.2       | 6.7   | 598                    | W                 | 69   | 5.9  | 7.3 | 1.6       | 8.8 | Y       | N                 | D                 | S                |
|               | 615           | W                 | 62   | 7.2  | 6.4 | 1.4       | 7.8   | 600                    | W                 | 63   | 9.9  | 6.7 | 1.7       | 7.1 | Y       | N                 | N                 | S                |
|               | 713           | W                 | 58   | 37.5 | 7.0 | 1.6       | 8.4   | 698                    | W                 | 59   | 13.0 | 6.8 | 1.5       | 9.0 | Y       | N                 | D                 | N                |
|               | 736           | W                 | 54   | 15.5 | 6.9 | 1.6       | 8.3   | 783                    | W                 | 63   | 11.5 | 6.5 | 1.4       | 8.8 | N       | Y                 | N                 | S                |
|               | 1031          | W                 | 53   | 23.1 | 6.8 | 1.5       | 8.2   | 809                    | W                 | 50   | 20.0 | 6.9 | 1.5       | 8.5 | N       | N                 | D                 | A                |
|               | 1086          | W                 | 51   | 24.2 | 6.8 | 1.4       | 8.1   | 863                    | W                 | 51   | 28.3 | 7.2 | 1.5       | 8.4 | N       | N                 | N                 | S                |
|               | 1122          | W                 | 55   | 15.4 | 6.7 | 1.4       | 7.9   | 926                    | W                 | 56   | 19.0 | 7.0 | 1.4       | 7.3 | N       | N                 | D                 | S                |
|               | 1047          | W                 | 43   | 12.0 | 6.9 | 1.8       | 9.0   | 943                    | W                 | 56   | 15.4 | 6.6 | 1.5       | 8.2 | Y       | Y                 | N                 | S                |
|               | 852           | W                 | 54   | 8.0  | 6.8 | 1.8       | 9.1   | 1001                   | W                 | 53   | 7.3  | 6.6 | 1.4       | 7.6 | N       | N                 | N                 | N                |
|               | 1067          | W                 | 49   | 6.0  | 6.6 | 1.4       | 8.2   | 1049                   | W                 | 48   | 5.4  | 6.6 | 1.5       | 8.4 | N       | N                 | D                 | N                |
|               | 604           | W                 | 39   | 19.3 | 7.1 | 2.1       | 8.6   | 1060                   | W                 | 30   | 11.1 | 6.6 | 1.3       | 8.3 | Y       | N                 | N                 | N                |
|               | 634           | W                 | 52   | 16.0 | 7.0 | 1.8       | 8.1   | 619                    | W                 | 55   | 18.8 | 6.9 | 1.3       | 7.9 | Y       | U                 | B D               | N                |
|               | 551           | W                 | 62   | 7.2  | 6.4 | 1.4       | 7.8   | 613                    | W                 | 59   | 15.6 | 7.0 | 1.9       | 9.1 | Y       | Y                 | N                 | N                |
|               | 685           | W                 | 57   | 14.0 | 6.6 | 1.5       | 8.0   | 505                    | W                 | 57   | 12.8 | 7.1 | 1.8       | 8.9 | Y       | Y                 | N                 | S                |
|               | 789           | W                 | 22   | 20.0 | 7.0 | 1.4       | 7.4   | 513                    | W                 | 24   | 13.1 | 6.9 | 1.5       | 7.0 | Y       | U                 | N                 | S                |
|               | 857           | W                 | 48   | 16.6 | 6.7 | 1.8       | 8.9   | 868                    | W                 | 47   | 10.5 | 6.8 | 1.5       | 9.3 | N       | Y                 | N                 | S                |
|               | 1462          | W                 | 47   | 17.2 | 6.2 | 2.0       | 8.5   | 1013                   | W                 | 46   | 16.1 | 6.3 | 1.5       | 8.0 | Y       | Y                 | N                 | N                |
|               | 1129          | W                 | 54   | 21.0 | 6.3 | 1.5       | 9.0   | 1161                   | W                 | 57   | 15.9 | 6.6 | 2.0       | 7.6 | N       | Y                 | D                 | S                |
|               | 1374          | W                 | 43   | 21.7 | 6.6 | 1.8       | 7.2   | 1226                   | W                 | 44   | 19.3 | 6.5 | 1.7       | 7.5 | N       | Y                 | N                 | N                |
|               | 1439          | W                 | 56   | 16.1 | 6.8 | 2.1       | 7.7   | 1253                   | W                 | 58   | 12.5 | 6.8 | 1.9       | 8.1 | N       | Y                 | D                 | N                |
| 1444          | W             | 46                | 22.0 | 6.3  | 2.1 | 8.4       | 1261  | W                      | 46                | 22.8 | 6.6  | 1.9 | 8.8       | N   | Y       | D                 | A                 |                  |
| 1031          | W             | 53                | 23.1 | 6.8  | 1.5 | 8.9       | 1312  | W                      | 51                | 24.6 | 6.5  | 1.6 | 8.1       | N   | Y       | N                 | A                 |                  |
| 1317          | W             | 56                | 22.9 | 6.4  | 1.3 | 6.9       | 1320  | W                      | 55                | 24.4 | 6.5  | 1.3 | 7.2       | N   | Y       | N                 | N                 |                  |
| 1214          | W             | 57                | 16.4 | 6.2  | 1.7 | 7.5       | 1389  | W                      | 61                | 16.0 | 6.6  | 1.9 | 8.4       | N   | Y       | N                 | S                 |                  |
| 1394          | W             | 45                | 17.3 | 6.6  | 1.9 | 7.3       | 10010 | W                      | 42                | 14.3 | 6.4  | 1.8 | 7.6       | Y   | Y       | D                 | S                 |                  |
| 1372          | W             | 37                | 20.5 | 6.6  | 1.6 | 9.0       | 10031 | W                      | 36                | 20.0 | 6.8  | 2.0 | 8.9       | N   | Y       | D                 | A                 |                  |
| <b>Female</b> | 731           | W                 | 63   | 10.5 | 6.2 | 1.6       | 8.2   | 565                    | W                 | 62   | 12.5 | 6.9 | 2.0       | 9.2 | Y       | Y                 | D                 | S                |
|               | 1270          | W                 | 73   | 19.7 | 6.7 | 1.4       | 7.7   | 860                    | W                 | 74   | 23.0 | 6.2 | 1.2       | 8.1 | N       | Y                 | B D               | N                |
|               | 1293          | W                 | 65   | 18.5 | 6.6 | 1.3       | 7.0   | 1272                   | W                 | 64   | 12.1 | 6.6 | 1.4       | 7.8 | N       | Y                 | B D               | N                |
|               | 1466          | B                 | 64   | 20.0 | 6.7 | 2.0       | 8.8   | 803                    | W                 | 65   | 18.0 | 7.0 | 1.9       | 9.0 | N       | Y                 | D                 | A                |
|               | 1247          | W                 | 58   | 22.7 | 6.4 | 1.3       | 8.4   | 934                    | W                 | 54   | 17.9 | 6.2 | 1.2       | 8.2 | N       | Y                 | D                 | N                |
|               | 1282          | W                 | 39   | 24.5 | 6.8 | 1.3       | 7.5   | 967                    | W                 | 40   | 22.2 | 6.6 | 1.6       | 7.4 | N       | Y                 | N                 | N                |
|               | 575           | B                 | 55   | 11.3 | 6.8 | 1.8       | 9.6   | 986                    | W                 | 53   | 11.9 | 6.7 | 1.8       | 8.7 | N       | Y                 | D                 | N                |
|               | 1391          | W                 | 51   | 7.8  | 6.6 | 1.6       | 7.1   | 1041                   | W                 | 52   | 10.3 | 6.5 | 1.5       | 8.4 | N       | Y                 | B D               | A                |
|               | 686           | W                 | 52   | 22.6 | 7.1 | 1.9       | 8.5   | 1143                   | W                 | 49   | 23.4 | 6.4 | 1.8       | 8.1 | N       | Y                 | B D               | A                |
|               | 1034          | W                 | 23   | 8.5  | 6.1 | 2.0       | 7.8   | 1157                   | W                 | 26   | 13.4 | 6.4 | 1.5       | 7.8 | Y       | Y                 | D                 | S                |
|               | 567           | W                 | 46   | 15.0 | 6.8 | 2.3       | 8.9   | 1190                   | W                 | 47   | 22.3 | 6.6 | 1.6       | 8.0 | Y       | Y                 | N                 | S                |
|               | 546           | W                 | 37   | 23.5 | 6.7 | 2.0       | 8.6   | 1221                   | B                 | 28   | 24.8 | 6.6 | 1.8       | 7.2 | N       | Y                 | N                 | N                |
|               | 1092          | B                 | 40   | 16.6 | 6.8 | 1.7       | 8.0   | 1249                   | W                 | 40   | 11.2 | 6.5 | 2.0       | 9.0 | N       | Y                 | B D               | A                |
|               | 1403          | W                 | 45   | 12.3 | 6.7 | 1.8       | 8.2   | 1254                   | W                 | 39   | 12.8 | 6.4 | 1.9       | 9.0 | Y       | Y                 | D                 | S                |
|               | 1318          | W                 | 58   | 18.8 | 6.7 | 2.0       | 7.4   | 1271                   | W                 | 50   | 18.6 | 6.4 | 1.8       | 8.6 | N       | Y                 | D                 | A                |
|               | 1196          | W                 | 36   | 14.5 | 6.4 | 1.8       | 8.2   | 1408                   | W                 | 37   | 15.5 | 6.6 | 1.6       | 7.0 | N       | Y                 | B D               | A                |
|               | 568           | W                 | 60   | 9.5  | 6.9 | 1.9       | 8.7   | 564                    | W                 | 56   | 16.8 | 7.0 | 1.9       | 9.2 | Y       | N                 | B D               | S                |
|               | 10013         | W                 | 16   | 9.3  | 6.7 | 1.8       | 9.0   | 666                    | W                 | 16   | 10.0 | 7.3 | 2.0       | 9.4 | N       | N                 | D                 | A                |
|               | 840           | W                 | 41   | 15.4 | 6.8 | 2.0       | 9.1   | 1202                   | W                 | 39   | 11.2 | 6.4 | 1.8       | 8.0 | N       | Y                 | D                 | N                |
|               | 1280          | W                 | 50   | 23.5 | 6.7 | 1.3       | 7.7   | 1289                   | W                 | 46   | 25.0 | 6.3 | 1.4       | 7.3 | N       | N                 | U                 | N                |
| 1099          | W             | 24                | 9.1  | 6.5  | 1.9 | 8.6       | 1315  | W                      | 28                | 12.4 | 7.0  | 1.5 | 7.9       | Y   | N       | N                 | S                 |                  |
| 627           | B             | 43                | 14.1 | 7.1  | 1.0 | 7.0       | 1332  | W                      | 46                | 17.5 | 6.7  | 1.6 | 8.9       | N   | Y       | B D               | N                 |                  |
| 818           | W             | 67                | 24.0 | 7.1  | 1.5 | 8.4       | 1356  | W                      | 60                | 20.6 | 6.1  | 1.8 | 8.5       | N   | Y       | D                 | A                 |                  |
| 1081          | W             | 57                | 14.9 | 6.8  | 1.8 | 9.0       | 1360  | W                      | 59                | 18.1 | 6.4  | 1.4 | 7.6       | Y   | N       | D                 | S                 |                  |
| 1355          | W             | 74                | 24.9 | 6.6  | 1.9 | 7.0       | 10028 | W                      | 72                | 23.1 | 6.7  | 1.4 | 7.0       | Y   | N       | N                 | S                 |                  |
|               | Mean          |                   | 50   | 16.9 | 6.7 | 1.7       | 8.1   | Mean                   |                   | 50   | 16.2 | 6.7 | 1.6       | 8.2 |         |                   |                   |                  |
|               | SEM           |                   | 2    | 0.9  | 0.0 | 0.0       | 0.1   | SEM                    |                   | 2    | 0.8  | 0.0 | 0.0       | 0.1 |         |                   |                   |                  |

<sup>1</sup>Psychotropic Medications at Time of Death (D is antidepressant, B is benzodiazepine, N is no, U is unknown)

<sup>2</sup>Race: W = Caucasian American B = African American

<sup>3</sup>cause of death: S = Suicide A = Accidental N = natural

**Supplemental Table 2. Cofactor Analysis in Post Mortem Subjects**

|                                                                                           |        | Sex             | Age  | PMI <sup>1</sup> | pH             | RNA ratio | RIN <sup>2</sup> | Suicide | ATOD <sup>3</sup> |
|-------------------------------------------------------------------------------------------|--------|-----------------|------|------------------|----------------|-----------|------------------|---------|-------------------|
| BDNF-IX                                                                                   | All    | .494            | .054 | .207             | .620           | .022      | .265             | .157    | 0.611             |
|                                                                                           | Male   |                 | .279 | .822             | .827           | .532      | .844             | .568    | 0.588             |
|                                                                                           | female |                 | .118 | .098             | .382           | .012      | .096             | .161    | 0.664             |
| TrkB-F                                                                                    | All    | .167            | .480 | .141             | .304           | .066      | .529             | .906    | 0.804             |
|                                                                                           | Male   |                 | .059 | .203             | .061           | .084      | .501             | .743    | 0.944             |
|                                                                                           | female |                 | .099 | .364             | .911           | .375      | .808             | .940    | 0.348             |
| CORT                                                                                      | All    | .084            | .038 | .592             | .889           | .150      | .277             | .449    | 0.244             |
|                                                                                           | Male   |                 | .005 | .209             | .500           | .078      | .628             | .733    | 0.313             |
|                                                                                           | female |                 | .390 | .325             | .464           | .527      | .165             | .189    | 0.728             |
| SST                                                                                       | All    | .016            | .010 | .488             | .069           | .925      | .997             | .005    | 0.399             |
|                                                                                           | Male   |                 | .049 | .962             | .851           | .813      | .394             | .170    | 0.109             |
|                                                                                           | female |                 | .191 | .312             | .042           | .622      | .510             | .012    | 0.560             |
| VGF                                                                                       | All    | .032            | .672 | .525             | .708           | .534      | .794             | .654    | 0.537             |
|                                                                                           | Male   |                 | .697 | .513             | .080           | .193      | .910             | .450    | 0.131             |
|                                                                                           | female |                 | .332 | .836             | .215           | .625      | .624             | .830    | 0.677             |
| SNAP25                                                                                    | All    | .302            | .860 | .092             | .618           | .127      | .924             | .359    | 0.110             |
|                                                                                           | Male   |                 | .084 | .129             | .248           | .014      | .990             | .268    | 0.211             |
|                                                                                           | female |                 | .086 | .453             | .713           | .847      | .990             | .307    | 0.025             |
| NPY                                                                                       | All    | .010            | .199 | .762             | .006           | .718      | .402             | .420    | 0.375             |
|                                                                                           | Male   |                 | .002 | .978             | .101           | .543      | .397             | .863    | 0.546             |
|                                                                                           | female |                 | .691 | .618             | .041           | .624      | .546             | .081    | 0.993             |
| TAC1                                                                                      | All    | <b>1.27E-04</b> | .222 | .985             | .078           | .170      | .210             | .225    | 0.506             |
|                                                                                           | Male   |                 | .001 | .914             | .378           | .531      | .563             | .703    | 0.629             |
|                                                                                           | female |                 | .913 | .954             | .245           | .015      | .079             | .263    | 0.933             |
| RGS4                                                                                      | All    | .602            | .677 | .550             | .326           | .002      | .595             | .828    | 0.610             |
|                                                                                           | Male   |                 | .186 | .685             | .028           | .111      | .910             | .453    | 0.454             |
|                                                                                           | female |                 | .843 | .657             | .802           | .014      | .613             | .860    | 0.413             |
| GAD1                                                                                      | All    | .121            | .073 | .187             | .364           | .019      | .270             | .998    | 0.551             |
|                                                                                           | Male   |                 | .016 | .122             | .114           | .013      | .772             | .389    | 0.812             |
|                                                                                           | female |                 | .702 | .948             | .605           | .487      | .221             | .110    | 0.985             |
| GAD2                                                                                      | All    | .609            | .732 | .551             | .413           | .012      | .112             | .230    | 0.325             |
|                                                                                           | Male   |                 | .491 | .377             | .375           | .162      | .181             | .554    | 0.350             |
|                                                                                           | female |                 | .886 | .792             | .592           | .046      | .273             | .196    | 0.843             |
| PVALB                                                                                     | All    | .004            | .124 | .008             | .742           | .001      | .775             | .275    | 0.883             |
|                                                                                           | Male   |                 | .001 | .043             | .092           | .001      | .555             | .170    | 0.745             |
|                                                                                           | female |                 | .588 | .088             | .138           | .157      | .989             | .707    | 0.280             |
| SLC6A1                                                                                    | All    | .013            | .010 | .348             | .004           | .739      | .940             | .668    | 0.287             |
|                                                                                           | Male   |                 | .314 | .532             | <b>1.7E-04</b> | .327      | .729             | .955    | 0.829             |
|                                                                                           | female |                 | .001 | .424             | .252           | .380      | .954             | .455    | 0.339             |
| CALB2                                                                                     | All    | .589            | .591 | .818             | .576           | .592      | .713             | .799    | 0.776             |
|                                                                                           | Male   |                 | .190 | .479             | .866           | .286      | .974             | .685    | 0.148             |
|                                                                                           | female |                 | .888 | .292             | .396           | .135      | .663             | .671    | 0.316             |
| GABRA1                                                                                    | All    | .006            | .157 | .226             | .527           | .065      | .363             | .910    | 0.488             |
|                                                                                           | Male   |                 | .009 | .503             | .698           | .006      | .081             | .889    | 0.583             |
|                                                                                           | female |                 | .808 | .299             | .394           | .760      | .879             | .969    | 0.081             |
| BDNF ELISA                                                                                | All    | <b>3.3E-04</b>  | .695 | .007             | .064           | .582      | .046             | .521    | 0.069             |
|                                                                                           | Male   |                 | .952 | .007             | .028           | .263      | .163             | .250    | 0.126             |
|                                                                                           | female |                 | .260 | .534             | .766           | .190      | .054             | .351    | 0.755             |
| <sup>1</sup> Post Mortem interval (hours)                                                 |        |                 |      |                  |                |           |                  |         |                   |
| <sup>2</sup> RNA Integrity Number                                                         |        |                 |      |                  |                |           |                  |         |                   |
| <sup>3</sup> antidepressants at time of death                                             |        |                 |      |                  |                |           |                  |         |                   |
| Grey highlighted p < 0.05 uncorrected                                                     |        |                 |      |                  |                |           |                  |         |                   |
| <b>Bold are included in ANCOVA modeling after Bonferonni-Holm Correction as Cofactors</b> |        |                 |      |                  |                |           |                  |         |                   |

**Supplemental Table 3. Suicide Effect on BDNF and BDNF-Dependent Gene Expression.**

Changes in suicide and non-suicide MDD subjects for genes with significant MDD effects are shown below. Highlighted in light grey are statistically significant  $p < 0.05$ . Dark grey indicates significance after correction for multiple testing.

|                     | All   |                | MDD & Suicide |                | MDD not Suicide |                |
|---------------------|-------|----------------|---------------|----------------|-----------------|----------------|
|                     | Alr   | <i>p value</i> | Alr           | <i>p value</i> | Alr             | <i>p value</i> |
| <b>TrkB</b>         | -0.52 | 0.003          | -0.51         | 0.039          | -0.52           | 0.015          |
| <b>CORT</b>         | -0.58 | 1.69E-05       | -0.54         | 0.002          | -0.68           | 2.63E-06       |
| <b>VGF</b>          | -0.63 | 0.001          | -0.69         | 0.007          | -0.58           | 0.010          |
| <b>SST</b>          | -0.59 | 0.001          | -0.04         | 0.861          | -0.83           | 0.005          |
| <b>TAC1</b>         | -0.42 | 0.016          | -0.26         | 0.285          | -0.55           | 0.008          |
| <b>NPY</b>          | -0.66 | 1.01E-04       | -0.53         | 0.015          | -0.72           | 4.25E-05       |
| <b>SNAP25</b>       | -0.69 | 4.53E-04       | -0.82         | 0.008          | -0.65           | 0.001          |
| <b>GAD2 (GAD65)</b> | -0.48 | 2.00E-03       | -0.37         | 0.116          | -0.54           | 0.001          |
| <b>GAD1 (GAD67)</b> | -0.41 | 1.00E-03       | -0.43         | 0.019          | -0.40           | 0.003          |
| <b>PVALB (PV)</b>   | -0.58 | 0.005          | -0.86         | 0.004          | -0.42           | 0.038          |
